# Supplementary material for: The Potential of Grapevine Leaf Extract in Treating Hyperpigmentation
Source: MDPI journal article supplement (doi:10.3390/cosmetics11010002), 2023-12-22
Supplement: s1 [file s1]

Supplementary Information

# The Potential of Grapevine Leaves Extract in Treating Hyperpigmentation

Dried extract weight and TPC ( from the smallest value to the largest)of the 23 tested grapevine varieties.

| Species            | TPC [mg gallic acid/g dried extract] | Dried extract [mg] |
|--------------------|--------------------------------------|--------------------|
| Petite Sirah       | 555 ± 47                             | 8 ± 0.61           |
| Cabernet Sauvignon | 682 ± 42                             | 7 ± 0.15           |
| Chenin Blanc       | 686 ± 91                             | 7 ± 0.12           |
| Pumela             | 749 ± 62                             | 6 ± 0.66           |
| Pinot Noir         | 756 ± 50                             | 7 ± 0.56           |
| Chardonnay         | 757 ± 72                             | 7 ± 0.46           |
| Viognier           | 791 ± 49                             | 7 ± 0.21           |
| Ness Ziona         | 809 ± 118                            | 6 ± 1.43           |
| Gewurztraminer     | 838 ± 52                             | 8 ± 0.53           |
| Beer               | 869 ± 42                             | 7 ± 0.55           |
| Sauvignon Blanc    | 878 ± 51                             | 8 ± 0.44           |
| Merlot             | 921 ± 60                             | 9 ± 0.36           |
| Malbec             | 958 ± 167                            | 10 ± 0.07          |
| Orcha              | 964 ± 73                             | 7 ± 0.78           |
| Batar Nitzanim     | 1011 ± 36                            | 7 ± 0.51           |
| Cabernet Franc     | 1032 ± 44                            | 8 ± 0.64           |
| Zeituni            | 1057 ± 80                            | 7 ± 1.25           |
| Tel Tzuba          | 1087 ± 26                            | 7 ± 0.98           |
| Harduf             | 1121 ± 23                            | 6 ± 0.15           |
| Dishon             | 1135 ± 46                            | 7 ± 0.85           |
| Shikama            | 1146 ± 47                            | 6 ± 0.61           |
| Nitzan 3 (Yael)    | 1161 ± 61                            | 6 ± 1.53           |
| Darwishi           | 1201 ± 26                            | 8 ± 0.61           |

|                                                                                     |              |                                                                                     |               |                                                                                     |                |                                                                                       |                 |
|-------------------------------------------------------------------------------------|--------------|-------------------------------------------------------------------------------------|---------------|-------------------------------------------------------------------------------------|----------------|---------------------------------------------------------------------------------------|-----------------|
|  | Israeli, Red |  | European, Red |  | Israeli, White |  | European, White |
|-------------------------------------------------------------------------------------|--------------|-------------------------------------------------------------------------------------|---------------|-------------------------------------------------------------------------------------|----------------|---------------------------------------------------------------------------------------|-----------------|

**Table S1:** Total polyphenol content and the dry weight of the extract for each of the tested varieties, n>8

A table summarizing the TPC value and the dry weight for all the tested varieties, it can be seen that there is no correlation between the dry weight and the total polyphenol content, it may be that there are additional substances that undergo extraction in the process.

Total polyphenol content (TPC) levels were compared via the Tukey-Kramer test, where statistical significance was defined as  $*p < 0.05$ . The concentration of the extract is 6 mg/mL in 10% DMSO.

| <b><u>Variety</u></b> | <b><u>Letter</u></b> | <b><u>Mean</u></b> |
|-----------------------|----------------------|--------------------|
| Darwishi              | A                    | 1201.7             |
| Nitzan 3 (Yael)       | AB                   | 1161.8             |
| Shikama               | ABC                  | 1146.6             |
| Dishon                | ABC                  | 1135.8             |
| Harduf                | ABCD                 | 1121.5             |
| Tel Tzuba             | BCDE                 | 1087.4             |
| Zeituni               | CDEF                 | 1057.7             |
| Cabernet Franc        | DEFG                 | 1033.0             |
| Batar Nitzanim        | EFGH                 | 1011.4             |
| Orcha                 | FGHI                 | 965.0              |
| Malbec                | GHI                  | 957.0              |
| Merlot                | HIJ                  | 921.6              |
| Sauvignon Blanc       | IJK                  | 878.5              |
| Beer                  | IJK                  | 869.0              |
| Gewurztraminer        | JKL                  | 838.7              |
| Ness Ziona            | KL                   | 809.7              |
| Viognier              | KL                   | 791.3              |
| Chardonnay            | LM                   | 757.2              |
| Pinot Noir            | LM                   | 756.9              |
| Pumela                | LM                   | 749.9              |
| Chenin Blanc          | M                    | 686.1              |
| Cabernet Sauvignon    | M                    | 682.1              |
| Petite Sirah          | N                    | 555.0              |

**Table S2:** Statistical analysis which proves the differences in the total polyphenol content in the tested varieties.

The Sun protection factor (SPF) value of 1.5 mg/mL of L. Extracts in 10% DMSO of the tested grapevine varieties. Results represent the mean of  $n > 3$ . Statistical analysis was conducted using the Tukey-Kramer test.

| <b><u>Variety</u></b> | <b><u>Letter</u></b> | <b><u>Mean</u></b> |
|-----------------------|----------------------|--------------------|
| Dishon                | A                    | 37.5               |

|                           |              |             |
|---------------------------|--------------|-------------|
| <b>Zeituni</b>            | <b>A</b>     | <b>37.4</b> |
| <b>Darwishi</b>           | <b>A</b>     | <b>37.0</b> |
| <b>Tel Tzuba</b>          | <b>A</b>     | <b>37.0</b> |
| <b>Cabernet Franc</b>     | <b>AB</b>    | <b>36.7</b> |
| <b>Shikama</b>            | <b>AB</b>    | <b>36.7</b> |
| <b>Ness Ziona</b>         | <b>AB</b>    | <b>36.5</b> |
| <b>Batar Nitzanim</b>     | <b>ABC</b>   | <b>36.0</b> |
| <b>Nitzan 3 (Yael)</b>    | <b>ABC</b>   | <b>35.4</b> |
| <b>Harduf</b>             | <b>ABCD</b>  | <b>34.9</b> |
| <b>Malbec</b>             | <b>ABCD</b>  | <b>34.6</b> |
| <b>Viognier</b>           | <b>ABCD</b>  | <b>34.5</b> |
| <b>Merlot</b>             | <b>ABCD</b>  | <b>33.8</b> |
| <b>Beer</b>               | <b>ABCD</b>  | <b>33.7</b> |
| <b>Chardonnay</b>         | <b>ABCDE</b> | <b>33.2</b> |
| <b>Gewurztraminer</b>     | <b>ABCDE</b> | <b>32.8</b> |
| <b>Pumela</b>             | <b>BCDE</b>  | <b>30.3</b> |
| <b>Chenin Blanc</b>       | <b>CDE</b>   | <b>29.8</b> |
| <b>Cabernet Sauvignon</b> | <b>CDE</b>   | <b>29.6</b> |
| <b>Orcha</b>              | <b>DE</b>    | <b>28.8</b> |
| <b>Pinot Noir</b>         | <b>EF</b>    | <b>26.9</b> |
| <b>Sauvignon Blanc</b>    | <b>EF</b>    | <b>26.8</b> |
| <b>Petite Sirah</b>       | <b>F</b>     | <b>21.2</b> |

**Table S3:** Statistical analysis which proves the differences in the sun protection factor in the tested varieties.

Statistical analysis of % inhibition of tyrosinase enzyme value was conducted using the Tukey-Kramer test

| <b><u>Variety</u></b>  | <b><u>Letter</u></b> | <b><u>Mean</u></b> |
|------------------------|----------------------|--------------------|
| <b>Darwishi</b>        | <b>A</b>             | <b>83.1</b>        |
| <b>Nitzan 3 (Yael)</b> | <b>AB</b>            | <b>75.6</b>        |
| <b>Ness Ziona</b>      | <b>AB</b>            | <b>74.7</b>        |
| <b>Cabernet Franc</b>  | <b>ABC</b>           | <b>70.8</b>        |
| <b>Zeituni</b>         | <b>ABC</b>           | <b>67.9</b>        |
| <b>Sauvignon Blanc</b> | <b>BCD</b>           | <b>59.0</b>        |
| <b>Harduf</b>          | <b>CD</b>            | <b>53.2</b>        |

|                       |            |             |
|-----------------------|------------|-------------|
| <b>Merlot</b>         | <b>CD</b>  | <b>52.5</b> |
| <b>Malbec</b>         | <b>CD</b>  | <b>51.1</b> |
| <b>Batar Nitzanim</b> | <b>DE</b>  | <b>47.8</b> |
| <b>Dishon</b>         | <b>DEF</b> | <b>38.9</b> |
| <b>Beer</b>           | <b>EFG</b> | <b>27.3</b> |
| <b>Tel Tzuba</b>      | <b>FG</b>  | <b>26.9</b> |
| <b>Gewurztraminer</b> | <b>FG</b>  | <b>26.3</b> |
| <b>Cabernet</b>       |            |             |
| <b>Sauvignon</b>      | <b>FG</b>  | <b>25.7</b> |
| <b>Pumela</b>         | <b>FGH</b> | <b>23.0</b> |
| <b>Viognier</b>       | <b>FGH</b> | <b>21.4</b> |
| <b>Chardonnay</b>     | <b>FGH</b> | <b>19.9</b> |
| <b>Pinot Noir</b>     | <b>FGH</b> | <b>19.3</b> |
| <b>Shikama</b>        | <b>GH</b>  | <b>18.2</b> |
| <b>Petite Sirah</b>   | <b>GH</b>  | <b>17.0</b> |
| <b>Shanin Blanc</b>   | <b>HI</b>  | <b>2.6</b>  |
| <b>Orcha</b>          | <b>H</b>   | <b>1.8</b>  |

**Table S4:** Statistical analysis which proves the differences in the Statistical analysis of the % inhibition of tyrosinase enzyme in the tested varieties.

The half-maximal inhibitory concentration-IC<sub>50</sub> [mg/mL] of 6 mg/mL of L. Extracts in 10% DMSO of the tested grapevine varieties. Results represent the mean of n>3. Statistical analysis was conducted using the Tukey-Kramer test.

| <b><u>Variety</u></b>  | <b><u>Letter</u></b> | <b><u>Mean</u></b> |
|------------------------|----------------------|--------------------|
| <b>Chenin Blanc</b>    | <b>A</b>             | <b>13.6</b>        |
| <b>Harduf</b>          | <b>AB</b>            | <b>11.9</b>        |
| <b>Cabernet</b>        |                      |                    |
| <b>Sauvignon</b>       | <b>ABC</b>           | <b>10.5</b>        |
| <b>Tel Tzuba</b>       | <b>ABCD</b>          | <b>9.8</b>         |
| <b>Pumela</b>          | <b>ABCDE</b>         | <b>8.8</b>         |
| <b>Pinot Noir</b>      | <b>BCDE</b>          | <b>8.3</b>         |
| <b>Petite Sirah</b>    | <b>BCDE</b>          | <b>7.8</b>         |
| <b>Gewurztraminer</b>  | <b>BCDEF</b>         | <b>7.3</b>         |
| <b>Viognier</b>        | <b>CDEF</b>          | <b>6.3</b>         |
| <b>Nitzan 3 (Yael)</b> | <b>CDEF</b>          | <b>6.2</b>         |
| <b>Malbec</b>          | <b>CDEF</b>          | <b>5.7</b>         |

|                        |             |            |
|------------------------|-------------|------------|
| <b>Batar Nitzanim</b>  | <b>CDEF</b> | <b>5.7</b> |
| <b>Shikama</b>         | <b>CDEF</b> | <b>5.6</b> |
| <b>Merlot</b>          | <b>DEF</b>  | <b>4.9</b> |
| <b>Sauvignon Blanc</b> | <b>EF</b>   | <b>4.2</b> |
| <b>Zeituni</b>         | <b>EF</b>   | <b>4.1</b> |
| <b>Darwishi</b>        | <b>EF</b>   | <b>3.8</b> |
| <b>Orcha</b>           | <b>EF</b>   | <b>3.6</b> |
| <b>Cabernet Franc</b>  | <b>FE</b>   | <b>3.6</b> |
| <b>Ness Ziona</b>      | <b>F</b>    | <b>2.8</b> |
| <b>Beer</b>            | <b>F</b>    | <b>2.6</b> |
| <b>Dishon</b>          | <b>F</b>    | <b>2.6</b> |
| <b>Chardonnay</b>      | <b>F</b>    | <b>2.4</b> |

**Table S5:** Statistical analysis which proves the differences in the Statistical analysis of the IC50 of tyrosinase enzyme in the tested varieties

### High-performance liquid chromatography (HPLC)

An HPLC analysis was performed for each of the extracts mentioned above, the following figure shows a chromatogram from the HPLC device which shows a nice and good separation of all the substances in the extract.

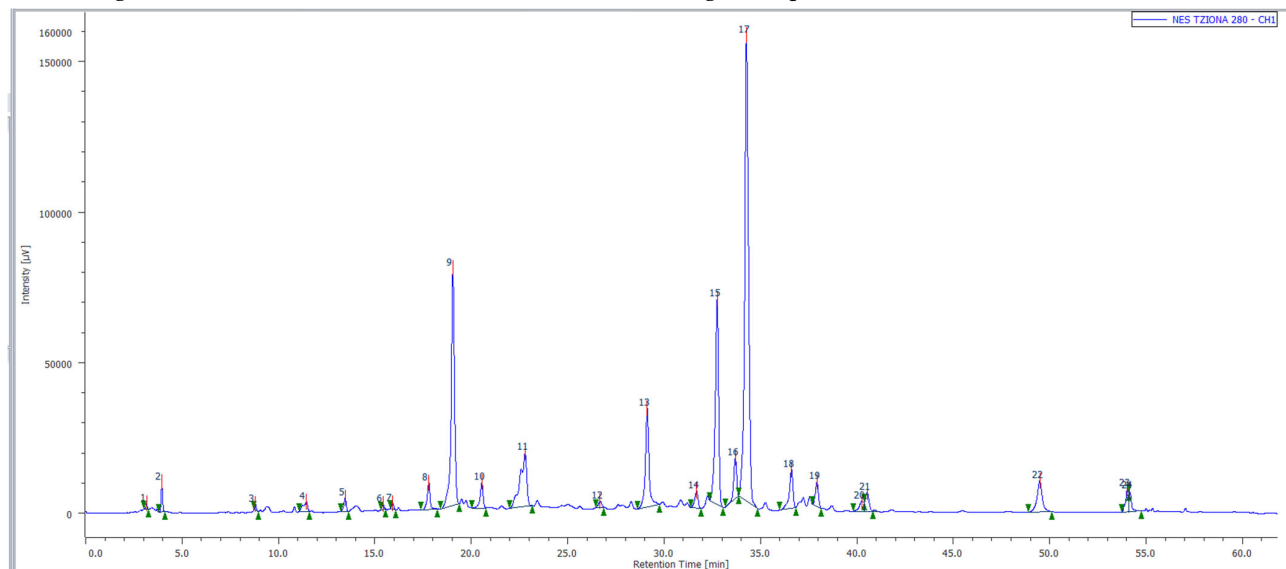

**Figure S1:** HPLC chromatogram.

Preliminary HPLC analysis of 11 European and 12 Israeli grapevine leaf extracts to quantify the polyphenols. The number of peaks found in the leaf extracts [at concentration 6 mg/mL] of all the tested varieties. The colors represent the different groups: Red Israeli, White Israeli, Red European, and White European.

| Israeli Varieties      | Number of peaks | European Varieties        | Number of peaks |
|------------------------|-----------------|---------------------------|-----------------|
| <b>Orcha</b>           | <b>16</b>       | <b>Cabernet Sauvignon</b> | <b>16</b>       |
| <b>Pumela</b>          | <b>18</b>       | <b>Malbec</b>             | <b>16</b>       |
| <b>Dishon</b>          | <b>20</b>       | <b>Petite Sirah</b>       | <b>16</b>       |
| <b>Zeituni</b>         | <b>20</b>       | <b>Pinot Noir</b>         | <b>16</b>       |
| <b>Harduf</b>          | <b>21</b>       | <b>Cabernet Franc</b>     | <b>18</b>       |
| <b>Nitzan 3 (Yael)</b> | <b>21</b>       | <b>Merlot</b>             | <b>20</b>       |
| <b>Ness Ziona</b>      | <b>24</b>       |                           |                 |
| <b>Beer</b>            | <b>17</b>       | <b>Chenin Blanc</b>       | <b>13</b>       |
| <b>Shikama</b>         | <b>19</b>       | <b>Gewurztraminer</b>     | <b>13</b>       |
| <b>Darwishi</b>        | <b>20</b>       | <b>Sauvignon Blanc</b>    | <b>13</b>       |
| <b>Tel Tzuba</b>       | <b>20</b>       | <b>Viognier</b>           | <b>13</b>       |
| <b>Batar Nitzanim</b>  | <b>21</b>       | <b>Chardonnay</b>         | <b>15</b>       |

**Table S6:** The amount of peaks for each of the tested varieties.
